# Supplementary material
Source: ML conference proceedings conference paper supplement (https://openreview.net/forum?id=mcN0ezbnzO)
Supplement: supplementary_material [file attachment]

## Sheet: Sheet1
Run ID	Action Space	Algorithm	Approach	Tuple
0	Discrete	DQN	Baseline	Naive
1	Discrete	DQN	Sample	Naive
2	Discrete	DQN	Sample	AdaptionPenalty
3	Discrete	DQN	Sample	SafeAction
4	Discrete	DQN	Sample	Both
5	Discrete	DQN	Failsafe	Naive
6	Discrete	DQN	Failsafe	AdaptionPenalty
7	Discrete	DQN	Masking	Naive
8	Discrete	DQN	Masking	AdaptionPenalty
9	Discrete	DQN	Projection	Naive
10	Discrete	DQN	Projection	AdaptionPenalty
11	Discrete	DQN	Projection	SafeAction
12	Discrete	DQN	Projection	Both
13	Discrete	PPO	Baseline	Naive
14	Discrete	PPO	Sample	Naive
15	Discrete	PPO	Sample	AdaptionPenalty
16	Discrete	PPO	Sample	SafeAction
17	Discrete	PPO	Sample	Both
18	Discrete	PPO	Failsafe	Naive
19	Discrete	PPO	Failsafe	AdaptionPenalty
20	Discrete	PPO	Masking	Naive
21	Discrete	PPO	Masking	AdaptionPenalty
22	Discrete	PPO	Projection	Naive
23	Discrete	PPO	Projection	AdaptionPenalty
24	Discrete	PPO	Projection	SafeAction
25	Discrete	PPO	Projection	Both
26	Continuous	TD3	Baseline	Naive
27	Continuous	TD3	Sample	Naive
28	Continuous	TD3	Sample	AdaptionPenalty
29	Continuous	TD3	Sample	SafeAction
30	Continuous	TD3	Sample	Both
31	Continuous	TD3	Failsafe	Naive
32	Continuous	TD3	Failsafe	AdaptionPenalty
33	Continuous	TD3	Masking	Naive
34	Continuous	TD3	Masking	AdaptionPenalty
35	Continuous	TD3	Projection	Naive
36	Continuous	TD3	Projection	AdaptionPenalty
37	Continuous	TD3	Projection	SafeAction
38	Continuous	TD3	Projection	Both
39	Continuous	PPO	Baseline	Naive
40	Continuous	PPO	Sample	Naive
41	Continuous	PPO	Sample	AdaptionPenalty
42	Continuous	PPO	Sample	SafeAction
43	Continuous	PPO	Sample	Both
44	Continuous	PPO	Failsafe	Naive
45	Continuous	PPO	Failsafe	AdaptionPenalty
46	Continuous	PPO	Masking	Naive
47	Continuous	PPO	Masking	AdaptionPenalty
48	Continuous	PPO	Projection	Naive
49	Continuous	PPO	Projection	AdaptionPenalty
50	Continuous	PPO	Projection	SafeAction
51	Continuous	PPO	Projection	Both
52	Continuous	SAC	Baseline	Naive
53	Continuous	SAC	Sample	Naive
54	Continuous	SAC	Sample	AdaptionPenalty
55	Continuous	SAC	Sample	SafeAction
56	Continuous	SAC	Sample	Both
57	Continuous	SAC	Failsafe	Naive
58	Continuous	SAC	Failsafe	AdaptionPenalty
59	Continuous	SAC	Masking	Naive
60	Continuous	SAC	Masking	AdaptionPenalty
61	Continuous	SAC	Projection	Naive
62	Continuous	SAC	Projection	AdaptionPenalty
63	Continuous	SAC	Projection	SafeAction
64	Continuous	SAC	Projection	Both
